# Supplementary material for: Rpl24Bst mutation suppresses colorectal cancer by promoting eEF2 phosphorylation via eEF2K
Source: eLife journal article supplement (doi:10.7554/elife.69729), 2021-11-29

Figure 1F

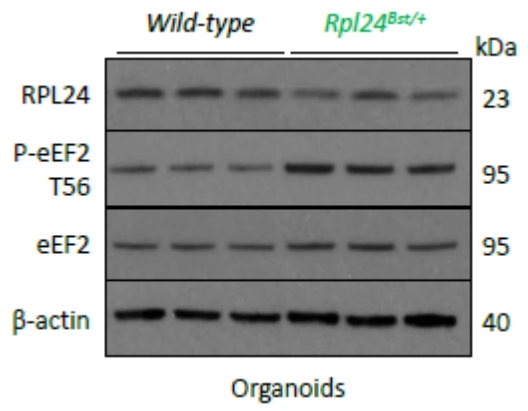

RPL24

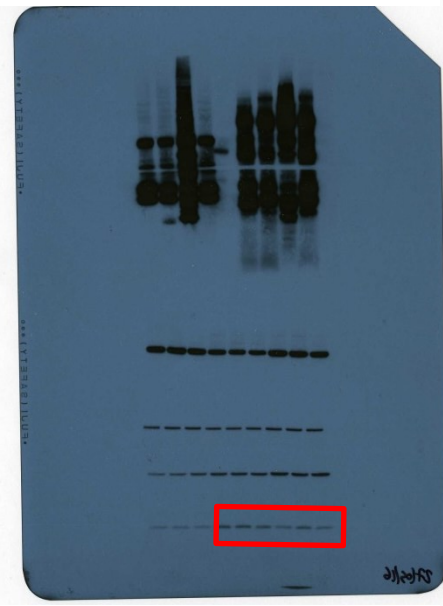

eEF2 T56-P

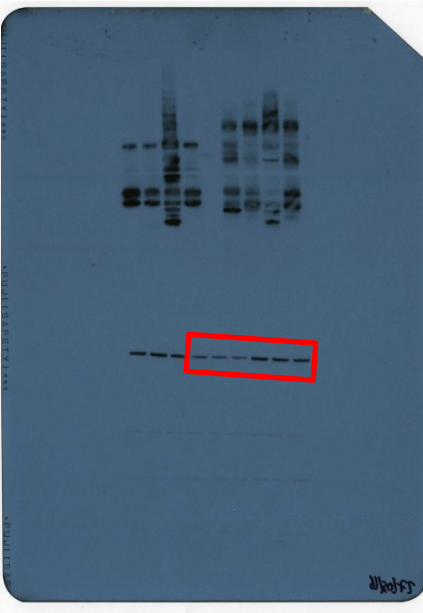

eEF2

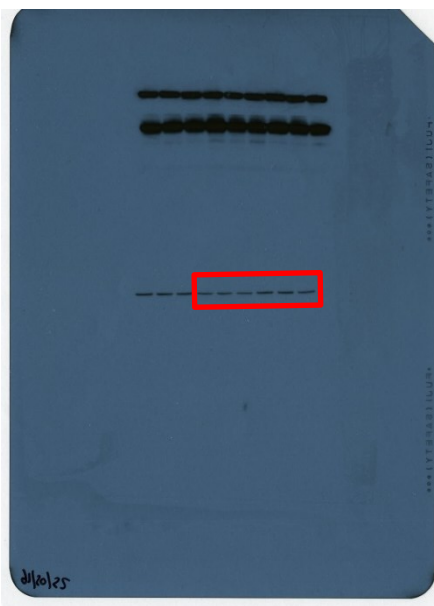

$\beta$ -actin

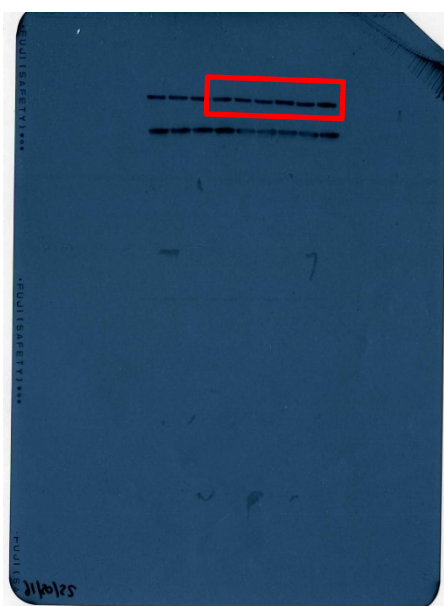

Supplement: fig1-data1 [file elife-69729-fig1-data1-v1.pdf]
