# Supplementary material for: Rpl24Bst mutation suppresses colorectal cancer by promoting eEF2 phosphorylation via eEF2K
Source: eLife journal article supplement (doi:10.7554/elife.69729), 2021-11-29

Figure 6 – figure supplement 2 – source data 1

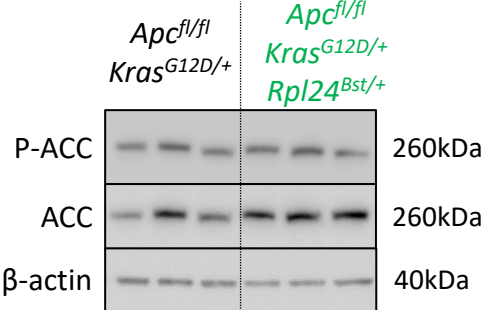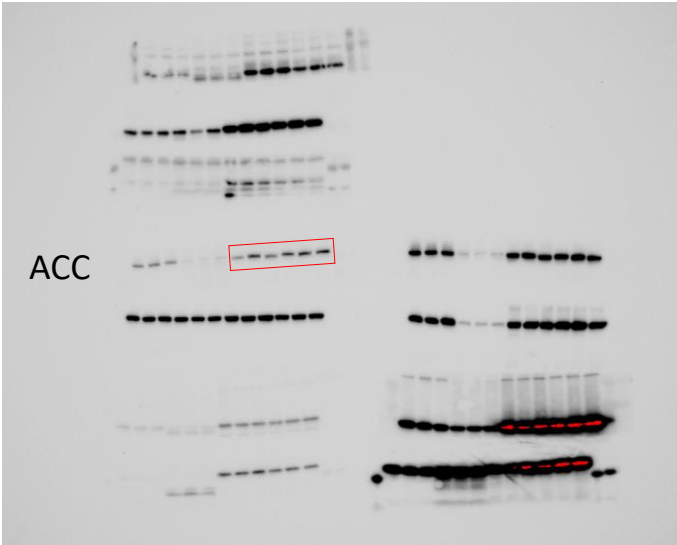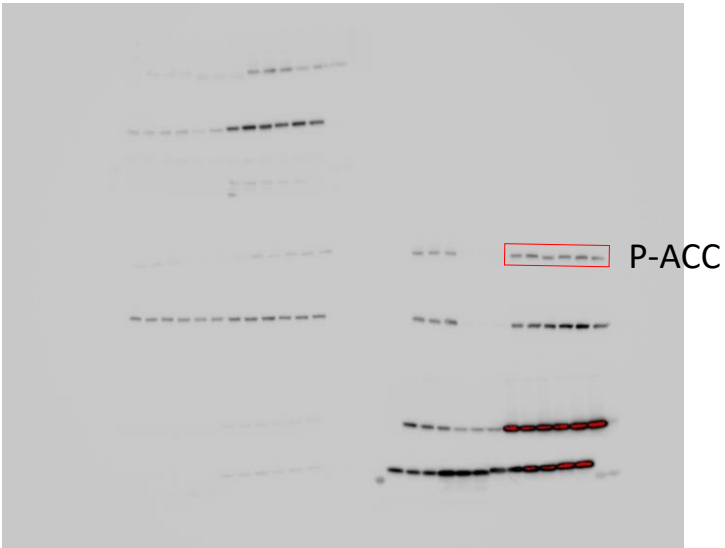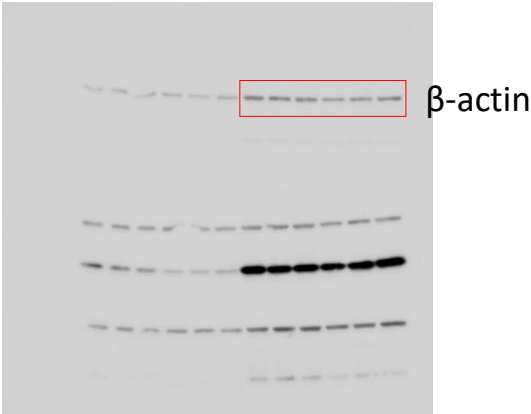

Supplement: fig6-figsupp2-data1 [file elife-69729-fig6-figsupp2-data1-v2.pdf]
