# Supplementary material for: Rpl24Bst mutation suppresses colorectal cancer by promoting eEF2 phosphorylation via eEF2K
Source: eLife. 2021 Dec 13;10:e69729. doi: 10.7554/eLife.69729 (PMC8668188; doi:10.7554/eLife.69729)
Supplement: Figure 4—source data 1. — Raw values tab shows the tabulated RNA sequencing reads for ribosomal proteins from triplicate wild-type (WT), VillinCreER Apcfl/fl (Apc) and VillinCreER Apcfl/fl KrasG12D/+ (Apc Kras) from whole intestine samples. Averages for the replicates are shown and fold change compared to WT expression. Average values tab shows all fold changes and the average fold change across all ribosomal proteins except Rpl24, and the fold change for Rpl24 for comparison. [file elife-69729-fig4-data1.xlsx]

## Sheet: Raw reads
gene_name	symbol	1 WT	2 WT	3 WT	19 Apc	20 Apc	21 Apc	10 ApcKras	11 ApcKras	12 ApcKras	Wt ave	APC ave	APC Kras Ave	Wt fold	APC fold	APC Kras fold
ribosomal protein, large, P0	Rplp0	4016.66	6268.85	5333.73	34509.3	8370.13	8485.22	19713.2	7995.34	55413.4	5206.41	17121.6	27707.3	1	3.28855	5.32177
ribosomal protein, large P2	Rplp2	931.566	1518.85	1563.66	8819.38	1948.63	2050.17	3155.19	1682.32	11831	1338.03	4272.72	5556.18	1	3.19331	4.15252
ribosomal protein L4	Rpl4	9250.48	12198	11778.9	41306.8	14902.9	15657.1	29986.7	14857.6	59420.3	11075.8	23955.6	34754.9	1	2.16287	3.13791
ribosomal protein L6	Rpl6	426.488	620.128	531.479	2455.41	724.392	773.063	1363.19	707.188	3294.57	526.032	1317.62	1788.32	1	2.50484	3.39964
ribosomal protein L7	Rpl7	1250.71	1648.43	1516.31	8106.68	2330.29	2476.61	4344.74	2045.97	11507.8	1471.82	4304.53	5966.16	1	2.92463	4.05359
ribosomal protein L8	Rpl8	7969.1	11814.8	10700.6	56604.6	13902.5	14648.3	30297.4	13606	82267.4	10161.5	28385.1	42056.9	1	2.7934	4.13885
ribosomal protein L10	Rpl10	1039.86	1394.83	1249.98	4038.6	1291.67	1499.56	2230.25	1272.75	5406.42	1228.22	2276.61	2969.81	1	1.85358	2.41797
ribosomal protein L10A	Rpl10a	1109.83	1306.9	1316.27	6376.1	1910.39	2126.29	3859.23	1767.49	9113.3	1244.33	3470.93	4913.34	1	2.78939	3.94858
ribosomal protein L11	Rpl11	78.5889	117.547	87.5934	322.533	111.926	167.768	187.823	70.8145	369.72	94.5763	200.742	209.452	1	2.12255	2.21464
ribosomal protein L12	Rpl12	2211.03	2992.35	2781.68	20529.4	4210.09	3992.43	9589.61	3778.05	31251.9	2661.69	9577.31	14873.2	1	3.59821	5.58788
ribosomal protein L13	Rpl13	758.095	1151.4	1073.61	5387.69	1174.18	1254.19	2664.96	1257.44	8079.63	994.369	2605.36	4000.68	1	2.62011	4.02333
ribosomal protein L13A	Rpl13a	2347.12	3489.38	3325	20309.2	4363.73	4356.05	10150.7	3962.74	30007.3	3053.83	9676.33	14706.9	1	3.16858	4.81589
ribosomal protein L14	Rpl14	865.436	1542.92	1557.74	7139.08	1849.91	2039.08	2931.93	1657.44	11302.6	1322.03	3676.03	5297.32	1	2.78059	4.00695
ribosomal protein L18	Rpl18	534.788	723.791	719.686	3778.5	901.666	908.312	2116.85	902.406	6705.28	659.422	1862.82	3241.51	1	2.82494	4.91569
ribosomal protein L18A	Rpl18a	1240.17	1674.35	1548.27	9062.15	1996.6	2042.78	3702.12	1723.47	11186.4	1487.6	4367.17	5537.34	1	2.93572	3.72234
ribosomal protein L19	Rpl19	35.4608	36.097	58.001	192.48	52.1395	99.7739	100.409	44.0198	298.098	43.1863	114.798	147.509	1	2.6582	3.41564
ribosomal protein L21	Rpl21	399.653	579.403	660.501	2590.67	691.022	710.242	1032.44	604.794	3350.7	546.519	1330.65	1662.64	1	2.43476	3.04224
ribosomal protein L22	Rpl22	1189.38	1466.09	1347.04	7116.54	1801.94	1733.11	2779.55	1556.01	9076.52	1334.17	3550.53	4470.69	1	2.66123	3.35091
ribosomal protein L22 like 1	Rpl22l1	310.522	477.591	512.54	2937.48	545.727	553.56	1416.35	690.92	5557.41	433.551	1345.59	2554.89	1	3.10365	5.89295
ribosomal protein L23	Rpl23	749.469	976.471	900.791	4912.56	1265.25	1325.88	2025.89	1057.43	6939.5	875.577	2501.23	3340.94	1	2.85667	3.8157
ribosomal protein L26	Rpl26	262.602	381.333	481.763	3114.35	532.518	628.206	1139.93	486.132	4874.1	375.233	1425.03	2166.72	1	3.79771	5.77435
ribosomal protein L27	Rpl27	188.805	348.938	285.27	1728.85	428.239	531.388	846.976	304.311	2502.87	274.338	896.158	1218.05	1	3.26663	4.43997
ribosomal protein L35	Rpl35	27.7936	26.8414	33.1434	135.256	33.3693	54.6909	80.3268	44.9768	267.127	29.2595	74.4387	130.81	1	2.54409	4.4707
ribosomal protein L36	Rpl36	239.6	402.621	379.966	2855.98	510.272	554.299	1199	460.294	4128.86	340.729	1306.85	1929.38	1	3.83546	5.66252
ribosomal protein L37	Rpl37	101.59	142.537	146.778	863.557	164.761	195.852	316.582	151.199	1234.98	130.302	408.057	567.587	1	3.13163	4.35594
ribosomal protein L38	Rpl38	26.8352	42.576	50.8988	215.022	42.4068	63.5597	100.409	36.3642	369.72	40.1033	106.996	168.831	1	2.66801	4.20989
ribosomal protein L39	Rpl39	185.93	391.514	356.292	2992.97	452.571	436.049	932.028	444.983	3596.54	311.245	1293.86	1657.85	1	4.15706	5.32651
ribosomal protein L41	Rpl41	25.8768	64.7895	78.1238	483.8	74.3857	83.5144	223.261	74.6423	907.845	56.2634	213.9	401.916	1	3.80176	7.14348
ribosomal protein SA	Rpsa	734.135	1296.72	1081.9	7584.73	1759.53	1637.03	3442.24	1416.29	10311.5	1037.58	3660.43	5056.68	1	3.52785	4.87352
ribosomal protein S2	Rps2	12.4592	22.2135	16.5717	116.181	24.3318	23.6501	66.1515	25.8377	178.085	17.0815	54.7211	90.0247	1	3.20353	5.27031
ribosomal protein S3	Rps3	6993.45	10004.4	8922.69	51744.1	12651.8	12451.8	30029.2	12576.3	77645	8640.19	25615.9	40083.5	1	2.96474	4.63919
ribosomal protein S3A1	Rps3a1	676.631	834.859	826.218	3962.3	1067.82	1101.21	1918.39	988.532	4322.43	779.236	2043.78	2409.78	1	2.62279	3.0925
ribosomal protein S5	Rps5	5875.95	8487.43	7765.03	51062.6	10817.2	10856.9	21930.4	9740.82	74892.4	7376.14	24245.6	35521.2	1	3.28703	4.81569
ribosomal protein S6	Rps6	496.452	779.325	647.481	2892.4	930.864	911.268	1598.27	834.463	4392.11	641.086	1578.18	2274.95	1	2.46172	3.54859
ribosomal protein S7	Rps7	253.018	390.588	334.985	2068.72	442.838	541.735	1152.93	488.046	3954.64	326.197	1017.77	1865.21	1	3.12009	5.71803
ribosomal protein S9	Rps9	3386.99	4773.14	4666.12	25341.4	6104.49	6147.55	12836.9	5564.68	37581.7	4275.42	12531.2	18661.1	1	2.93098	4.36475
ribosomal protein S10	Rps10	589.416	816.348	716.135	4324.72	946.158	964.481	2309.4	963.651	7028.54	707.3	2078.45	3433.86	1	2.93857	4.85489
ribosomal protein S11	Rps11	1168.29	1703.04	1706.89	9218.21	1879.8	2138.12	4184.08	1987.59	14237.1	1526.07	4412.04	6802.93	1	2.89111	4.4578
ribosomal protein S14	Rps14	1301.51	1571.61	1935.34	14831.3	2272.59	1919.35	6419.06	2187.59	23549.8	1602.82	6341.09	10718.8	1	3.95621	6.68748
ribosomal protein S15	Rps15	1739.5	2574.92	2457.35	16575.8	2883.66	2818.8	6456.86	2714.88	24575.7	2257.26	7426.08	11249.1	1	3.28987	4.98355
ribosomal protein S17	Rps17	235.767	314.692	331.434	1716.71	378.88	366.577	820.988	409.576	2982.92	293.964	820.722	1404.49	1	2.79191	4.77777
ribosomal protein S18	Rps18	1255.5	1554.02	1539.99	11283.5	2055.69	2413.05	5013.34	2030.65	15328.8	1449.84	5250.73	7457.61	1	3.6216	5.14376
ribosomal protein S19	Rps19	226.183	284.148	330.251	1964.68	301.019	480.393	875.326	337.804	2942.27	280.194	915.363	1385.13	1	3.26689	4.94348
ribosomal protein S20	Rps20	1912.01	2619.35	2639.64	18441.6	3238.91	3556.38	7423.15	3243.11	29322.1	2390.33	8412.3	13329.4	1	3.5193	5.5764
ribosomal protein S21	Rps21	500.285	810.795	787.157	7236.19	921.131	1152.2	2393.27	955.996	10418	699.412	3103.18	4589.07	1	4.43683	6.56133
ribosomal protein S23	Rps23	656.504	921.862	853.443	5392.9	1092.84	1110.82	2107.4	921.546	7417.62	810.603	2532.19	3482.19	1	3.12383	4.2958
ribosomal protein S24	Rps24	682.381	998.684	851.076	5429.31	1115.79	1045.78	2533.84	1104.32	8619.69	844.047	2530.29	4085.95	1	2.99781	4.8409
ribosomal protein S26	Rps26	672.797	999.61	972.997	4570.96	1204.77	1206.89	2049.52	995.231	6147.8	881.801	2327.54	3064.18	1	2.63953	3.47491
ribosomal protein S27	Rps27	397.736	534.976	487.682	3329.38	508.882	516.607	1293.5	541.635	5044.45	473.465	1451.62	2293.19	1	3.06595	4.84343
ribosomal protein S27-like	Rps27l	530.954	878.361	897.24	3674.45	725.087	911.268	1456.51	689.006	4742.48	768.852	1770.27	2296	1	2.30248	2.98627
ribosomal protein S28	Rps28	68.0465	295.255	99.4303	1501.69	230.804	201.026	747.748	102.394	1411.13	154.244	644.506	753.757	1	4.17848	4.88678
ribosomal protein S29	Rps29	22.0432	37.0226	33.1434	156.065	32.6741	55.4299	66.1515	36.3642	189.699	30.7364	81.3895	97.4049	1	2.64798	3.16904
ribosomal protein L24	Rpl24	18.2096	26.8414	20.1228	65.8939	20.8558	30.3017	51.9762	18.1821	63.8782	21.7246	39.0171	44.6788	1	1.79599	2.0566

## Sheet: Average values
	Wild-type	Apcfl/fl	Apcfl/fl KrasG12D/+	Fold change
Rplp0	1	3.28855	5.32177	1.61827
Rplp2	1	3.19331	4.15252	1.30038
Rpl4	1	2.16287	3.13791	1.45081
Rpl6	1	2.50484	3.39964	1.35723
Rpl7	1	2.92463	4.05359	1.38602
Rpl8	1	2.7934	4.13885	1.48165
Rpl10	1	1.85358	2.41797	1.30449
Rpl10a	1	2.78939	3.94858	1.41557
Rpl11	1	2.12255	2.21464	1.04339
Rpl12	1	3.59821	5.58788	1.55296
Rpl13	1	2.62011	4.02333	1.53556
Rpl13a	1	3.16858	4.81589	1.51989
Rpl14	1	2.78059	4.00695	1.44104
Rpl18	1	2.82494	4.91569	1.74011
Rpl18a	1	2.93573	3.72234	1.26795
Rpl19	1	2.6582	3.41564	1.28495
Rpl21	1	2.43476	3.04224	1.2495
Rpl22	1	2.66123	3.35091	1.25916
Rpl22l1	1	3.10365	5.89295	1.89872
Rpl23	1	2.85667	3.8157	1.33572
Rpl26	1	3.79771	5.77435	1.52048
Rpl27	1	3.26663	4.43997	1.35919
Rpl35	1	2.54409	4.4707	1.75729
Rpl36	1	3.83546	5.66252	1.47636
Rpl37	1	3.13163	4.35594	1.39095
Rpl38	1	2.66801	4.20989	1.57791
Rpl39	1	4.15706	5.32651	1.28132
Rpl41	1	3.80176	7.14348	1.87899
Rpsa	1	3.52785	4.87352	1.38144
Rps2	1	3.20353	5.27031	1.64516
Rps3	1	2.96474	4.63919	1.56479
Rps3a1	1	2.62279	3.0925	1.17908
Rps5	1	3.28702	4.81569	1.46506
Rps6	1	2.46172	3.54859	1.4415
Rps7	1	3.12009	5.71803	1.83265
Rps9	1	2.93098	4.36475	1.48918
Rps10	1	2.93858	4.85489	1.65212
Rps11	1	2.89111	4.4578	1.5419
Rps14	1	3.95621	6.68748	1.69037
Rps15	1	3.28987	4.98355	1.51482
Rps17	1	2.79191	4.77777	1.71129
Rps18	1	3.6216	5.14376	1.4203
Rps19	1	3.26689	4.94348	1.51321
Rps20	1	3.5193	5.5764	1.58452
Rps21	1	4.43683	6.56133	1.47883
Rps23	1	3.12383	4.2958	1.37517
Rps24	1	2.99781	4.8409	1.61481
Rps26	1	2.63953	3.47491	1.31649
Rps27	1	3.06595	4.84343	1.57975
Rps27l	1	2.30248	2.98627	1.29698
Rps28	1	4.17848	4.88678	1.16951
Rps29	1	2.64798	3.16904	1.19677	1.46811
Rpl24	1	1.79599	2.0566	1.14511
